# Supplementary material
Source: Royal Society of Chemistry journal article supplement (doi:10.1039/d5va00445d)
Supplement: d5va00445d1.pdf [file d5va00445d1.pdf]

## Techno-economic analysis and life cycle assessment of sustainable farnesene production by genetically engineered cyanobacteria utilizing carbon dioxide: A step towards commercial viability

Akhil Rautela, Indrajeet Yadav, Agendra Gangwar, Preeti Yadav, Sanjay Kumar\*

**Supplementary Table 1: MFSP analysis**

| Parameters required |                                      | Million USD |
|---------------------|--------------------------------------|-------------|
| FR                  | farnesene Revenue                    | 13.49201587 |
| ER                  | Revenue without farnesene            | 20.819      |
| OC                  | Operating Cost                       | 30.758      |
| DR                  | Discount rate                        | 0.0674      |
| TPI                 | Total Project investment             | 28.162      |
| DC                  | Depreciation cost (million USD/year) | 0.845       |
| Interest            | Interest rate                        | 0.2         |
| TR                  | Tax Rate                             | 0.35        |
| Re                  | Residual (salvage value)             | 11.265      |
| ELS                 | Economic life of project (Year)      | 20.000      |
| Capex               | Capital cost                         | 28.162      |

**Supplementary Table 2: Financial calculations**

|                                                 |              |
|-------------------------------------------------|--------------|
| Depreciation cost (million USD/year)            | 0.844849809  |
| Return on investment (ROI)                      | 2.604783934  |
| Income tax (IT) (0.35*FR)                       | -3.774548719 |
| Farnesene revenue (FR) (million/year) (0.65*FR) | 8.770        |
| Farnesene revenue (FR) (million USD/year)       | 13.49201587  |
| farnesene revenue (FR) (USD/year)               | 13492015.87  |

**Supplementary Table 3: Farnesene Productivity**

|                     | <b>Farnesene<br/>productivity<br/>(kg/day/100m<sup>3</sup>)</b> | <b>Farnesene<br/>productivity<br/>(g/m<sup>3</sup>/day)</b> | <b>Farnesene<br/>production<br/>(kg/year)</b> | <b>FR<br/>(USD/year)</b> | <b>MFSP<br/>(USD/kg)</b> |
|---------------------|-----------------------------------------------------------------|-------------------------------------------------------------|-----------------------------------------------|--------------------------|--------------------------|
|                     | 0.1287                                                          | 1.287                                                       | 45443.97                                      | 13492015.87              | 296.8934244              |
|                     | 0.2                                                             | 2                                                           | 70620                                         | 13492015.87              | 191.0509186              |
| Actual productivity | 0.2574                                                          | 2.574                                                       | 90887.94                                      | 13492015.87              | 148.4467122              |
|                     | 0.5148                                                          | 5.148                                                       | 181775.88                                     | 13492015.87              | 74.22335611              |
| 10x                 | 2.574                                                           | 25.74                                                       | 345713.94                                     | 13492015.87              | 39.02653122              |
| 20x                 | 5.148                                                           | 51.48                                                       | 691427.88                                     | 13492015.87              | 19.51326561              |
| 30x                 | 7.722                                                           | 77.22                                                       | 1037141.82                                    | 13492015.87              | 13.00884374              |
| 40x                 | 10.296                                                          | 102.96                                                      | 1382855.76                                    | 13492015.87              | 9.756632806              |
| 50x                 | 12.87                                                           | 128.7                                                       | 1728569.7                                     | 13492015.87              | 7.805306245              |
| 60x                 | 15.444                                                          | 154.44                                                      | 2074283.64                                    | 13492015.87              | 6.504421871              |
| 70x                 | 18.018                                                          | 180.18                                                      | 2419997.58                                    | 13492015.87              | 5.575218746              |
| 80x                 | 20.592                                                          | 205.92                                                      | 2765711.52                                    | 13492015.87              | 4.878316403              |
| 90x                 | 23.166                                                          | 231.66                                                      | 3111425.46                                    | 13492015.87              | 4.336281247              |
| 100x                | 25.74                                                           | 463.32                                                      | 3457139.4                                     | 13492015.87              | 3.902653122              |
| 110x                | 28.314                                                          | 2316.6                                                      | 3802853.34                                    | 13492015.87              | 3.547866475              |
| 120x                | 30.888                                                          | 4633.2                                                      | 4148567.28                                    | 13492015.87              | 3.252210935              |
| 130x                | 33.462                                                          | 6949.8                                                      | 4494281.22                                    | 13492015.87              | 3.002040863              |
| 140x                | 36.036                                                          | 9266.4                                                      | 4839995.16                                    | 13492015.87              | 2.787609373              |
| 150x                | 38.61                                                           | 11583                                                       | 5185709.1                                     | 13492015.87              | 2.601768748              |
| 200x                | 51.48                                                           | 13899.6                                                     | 6914278.8                                     | 13492015.87              | 1.951326561              |
| 1000x               | 257.4                                                           | 16216.2                                                     | 34571394                                      | 13492015.87              | 0.390265312              |

**Supplementary Table 4: MFSP variation over a range of farnesene productivity (g/m<sup>3</sup>/day)**

| Parameter                                      | Lower bound | Base value | Upper bound | MFSP LB | MFSP UB | MFSP base value | MFSP (high diff) | MFSP (low diff.) | % change LB  | % change UB  |
|------------------------------------------------|-------------|------------|-------------|---------|---------|-----------------|------------------|------------------|--------------|--------------|
| Nitrogen cost (\$/kg)                          | 0.1         | 0.15       | 0.5         | 147.864 | 152.526 | 148.447         | 4.079            | -0.583           | 0.39273276   | -2.747782037 |
| Cost of PBRs                                   | 6           | 6.87       | 7.5         | 147.239 | 149.321 | 148.447         | 0.874            | -1.208           | 0.813758446  | -0.588762319 |
| Project length (year)                          | 15          | 20         | 30          | 154.169 | 143.44  | 148.447         | 5.722            | -5.007           | -3.85457436  | 3.372920975  |
| cost of land \$/acre                           | 0           | 3000       | 5000        | 0       | 143.473 | 148.447         | -4.974           | 0                | 100          | 3.350690819  |
| Cost of inducer                                | 5           | 7          | 15          | 144.748 | 163.241 | 148.447         | 14.794           | -3.699           | 2.49179842   | -9.965846396 |
| Cost of isopropyl myristate                    | 0.01        | 0.0167     | 0.5         | 148.172 | 168.252 | 148.447         | 19.805           | -0.275           | 0.185251302  | -13.34146194 |
| Cost of electricity                            | 0.08        | 0.088      | 0.11        | 120.72  | 224.36  | 148.447         | 75.913           | -27.727          | 18.67804671  | -51.13811663 |
| Farnesene productivity (g/m <sup>3</sup> /day) | 2           | 2.574      | 25.74       | 191.051 | 39.02   | 148.447         | 42.604           | -109.427         | -28.69980532 | 73.71452438  |

**Supplementary Table 5: Net Present value (NPV)**

| Year | CapEx  | OpEx        | Revenue     | Cash Flow    | Discounted cash flow |
|------|--------|-------------|-------------|--------------|----------------------|
| 2024 | 28.161 | 15.37920945 | 17.15542983 | -26.38477961 | -24.72800339         |
| 2025 |        | 30.7584189  | 34.31085967 | 3.552440771  | 3.120311897          |
| 2026 |        | 30.7584189  | 34.31085967 | 3.552440771  | 2.924378535          |
| 2027 |        | 30.7584189  | 34.31085967 | 3.552440771  | 2.740748392          |
| 2028 |        | 30.7584189  | 34.31085967 | 3.552440771  | 2.568648915          |
| 2029 |        | 30.7584189  | 34.31085967 | 3.552440771  | 2.407356059          |
| 2030 |        | 30.7584189  | 34.31085967 | 3.552440771  | 2.407356059          |
| 2031 |        | 30.7584189  | 34.31085967 | 3.552440771  | 2.256191246          |
| 2032 |        | 30.7584189  | 34.31085967 | 3.552440771  | 2.114518506          |
| 2033 |        | 30.7584189  | 34.31085967 | 3.552440771  | 1.981741805          |
| 2034 |        | 30.7584189  | 34.31085967 | 3.552440771  | 1.857302535          |
| 2035 |        | 30.7584189  | 34.31085967 | 3.552440771  | 1.740677165          |
| 2036 |        | 30.7584189  | 34.31085967 | 3.552440771  | 1.631375038          |
| 2037 |        | 30.7584189  | 34.31085967 | 3.552440771  | 1.528936305          |
| 2038 |        | 30.7584189  | 34.31085967 | 3.552440771  | 1.432929995          |
| 2039 |        | 30.7584189  | 34.31085967 | 3.552440771  | 1.342952198          |
| 2040 |        | 30.7584189  | 34.31085967 | 3.552440771  | 1.258624366          |
| 2041 |        | 30.7584189  | 34.31085967 | 3.552440771  | 1.17959172           |
| 2042 |        | 30.7584189  | 34.31085967 | 3.552440771  | 1.105521762          |
| 2043 |        | 30.7584189  | 34.31085967 | 3.552440771  | 1.03610287           |
| 2044 |        | 30.7584189  | 34.31085967 | 3.552440771  | 0.97104299           |
|      |        |             |             | NPV          | 12.87830497          |
|      |        |             |             | IRR          | 12%                  |

Net cash flow = revenue-OpEx

NPV= Sum of discounted cash flow
